# Supplementary material for: Region-specific and activity-dependent regulation of SVZ neurogenesis and recovery after stroke
Source: PubMed Central journal article supplement — Proc Natl Acad Sci U S A. 2019 Jun 13;116(27):13621–30. doi: 10.1073/pnas.1811825116 (PMC6612913; doi:10.1073/pnas.1811825116), 2019-06-13

## Supplementary Figure legends:

### Supplementary Figure 1:

#### Post-stroke neurogenesis and *Ascl1creERT2::tdTomato* line in stroke

**(A)** Low magnification confocal micrograph of whole brain coronal section stained with DCX and GFAP 14 days after stroke. The peri-infarct region is outlined by the dashed line. Scale bar: 500  $\mu\text{m}$ . **(B)** High magnification confocal micrographs of DCX<sup>+</sup> and Ki67<sup>+</sup> cells in the peri-infarct cortex 14 days after stroke. **(C)** In the absence of CreERT2 expression, no tdTomato expression was induced by Tamoxifen (left). In the presence of CreERT2 expression, Tamoxifen administration for 5 days induced a robust and specific expression of tdTomato in the SVZ and rostral migratory stream (RMS). **(D)** High magnification confocal micrographs of tdTomato<sup>+</sup> cells in the SVZ and RMS. tdTomato<sup>+</sup> cells co-express the progenitor marker Ki67 and neuroblast marker DCX. **(E)** Confocal micrographs of tdTomato<sup>+</sup> and GFP<sup>+</sup> cells in the SVZ, 21 days after virus injection. Scale bar: 20  $\mu\text{m}$  **(B)** Confocal micrographs of tdTomato<sup>+</sup> and GFP<sup>+</sup> cells in the OB, 21 days after virus injection. Scale bar: 5  $\mu\text{m}$ . **(G,H)** Expression of *Ascl1creERT2::tdTomato* cells at 3 days and 10 days after stroke. Tamoxifen was administered once per day for 5 consecutive days, starting from 2 days before stroke till 3 days after stroke. Confocal micrographs of tdTomato<sup>+</sup> cells at 3 days **(G)** and 10 days **(H)** after stroke. Expression of tdTomato<sup>+</sup> cells in the white matter (WM) and peri-infarct is shown in higher magnification (regions highlighted in box). Scale bar: 100 $\mu\text{m}$  in lower magnification, 20 $\mu\text{m}$  in higher magnification.

### Supplementary Figure 2:

#### Viral labeling of SVZ progenitors using the lentivirus EF1a-FLEXEGFP in the *Ascl1creERT2::tdTomato* animals

**(A-D)** Cre-dependent lentivirus expressing the EF1a-FLEXEGFP was injected into the lateral ventricle of *Ascl1-CreERT2* mice. 7 days after injection, Tamoxifen was administered once per day for 5 consecutive days starting from 2 days before stroke till 3 days after stroke. **(A)** Cre-induced tdTomato from the germline and GFP from the lentivirus, 14 days after stroke in the SVZ or in the peri-infarct cortex. Scale bar: 10 $\mu\text{m}$ . **(B-C)** Low magnification images of SVZ-derived cells migrating from the SVZ to the peri-infarct cortex at 3 days **(B)** and 10 days **(C)** after stroke. Expression of EGFP<sup>+</sup> cells in the white matter (WM) and peri-infarct is shown in higher magnification on the right of each row (regions highlighted in box). Scale bar: 100 $\mu\text{m}$  in lower magnification, 20 $\mu\text{m}$  in higher magnification. **(D)** Confocal micrograph of the viral injection site in the CTX, with higher magnification micrographs showing the injection regions highlighted with the boxes. Scale: 100 $\mu\text{m}$  in lower magnification, 50 $\mu\text{m}$  in higher magnification.

### **Supplementary Figure 3:**

#### **Neuronal marker expression of *Ascl1creERT2::tdTomato* cells in the peri-infarct at 2 months after stroke**

*Ascl1creERT2::tdTomato*<sup>+</sup> neurons expressed both the inhibitory neuronal marker GABA **(A)** and excitatory neuronal marker CAMKII $\alpha$  **(B)** in the peri-infarct at 2 months after stroke. *tdTomato*<sup>+</sup> cells co-labeled with either GABA or CAMKII $\alpha$  are highlighted by white arrowheads. Scale bar: 10 $\mu$ m

### **Supplementary Figure 4:**

#### **Immediate early gene expression in the DREADD modulated cells**

**(A)** Confocal micrographs of *tdTomato*<sup>+</sup> and Zif268<sup>+</sup> cells in the peri-infarct cortex of animals receiving CAMKII-Gq *tdTomato* injection in the peri-infarct region, with either saline or CNO treatment. Open arrowheads: *TdTomato*<sup>+</sup>Zif268<sup>-</sup> cells in (A) and EGFP<sup>+</sup>pERK<sup>-</sup> cells in (C) Scale bar: 5  $\mu$ m **(B)** Percentage of *tdTomato*<sup>+</sup> Zif268<sup>+</sup> among all *tdTomato*<sup>+</sup> cells in the peri-infarct, compared between the saline and CNO treatment group. **(C)** Confocal micrographs of EGFP<sup>+</sup> and pERK<sup>+</sup> cells in the peri-infarct cortex of animals receiving GFAP-Gi GFP injection in the peri-infarct region, with either saline or CNO treatment. Scale bar: 5  $\mu$ m **(D)** Percentage of EGFP<sup>+</sup> pERK<sup>+</sup> among all EGFP<sup>+</sup> cells in the peri-infarct, compared between the saline and CNO treatment group. Asterisk: p value < 0.05

### **Supplementary Figure 5:**

#### **Pre- and post-synaptic marker expression of *Ascl1creERT2::tdTomato* cells in the peri-infarct at 2 months after stroke**

**(A)** Confocal micrographs showing expression of presynaptic marker vGlut1 and post-synaptic marker Homer1 in the *Ascl1creERT2::tdTomato* cells. Synaptic marker expression in the region highlighted with a box is shown with higher magnification. Scale bar: lower magnification: 10  $\mu$ m, higher magnification: 5  $\mu$ m. **(B)** BDA was injected into the pre-motor cortex 7 days before the *Ascl1creERT2::tdTomato* animals were sacrificed at 2 months after stroke. Confocal micrographs showing expression of BDA with the post-synaptic marker Homer1 in the *Ascl1creERT2::tdTomato* cells. Synaptic marker expression in the region highlighted with a box is shown with higher magnification. Scale bar: lower magnification: 10  $\mu$ m, higher magnification: 5  $\mu$ m.

### **Supplementary Figure 6:**

## **Schematic of approach rabies-based and cre-dependent monosynaptic tracing in the Ascl1CreERT2:: tdTomato transgenic animals targeted neurons specifically derived from SVZ**

(A) Schematic demonstration of the helper plasmid EF1- $\alpha$  - FLEX BTG. AAV2 expressing the helper EF1- $\alpha$  - FLEX BTG was injected into the lateral ventricle of Ascl1 CreERT2 (+);tdTomato animals 7 days before stroke. Animals were allowed to survive 2 months after stroke and the rabies BFP was injected into the peri-infarct region 4 days before sacrifice. (B) Schematic demonstration of the rabies virus-based monosynaptic tracing from the SVZ-derived Ascl1 CreERT2 (+);tdTomato cells. (C) Schematic demonstration of the Syn-FLEX-EYFP and Syn-FLEX-TeNT-EYFP plasmids. AAV2 expressing either the Syn-FLEX-EYFP or Syn-FLEX-TeNT-EYFP was co-injected with the AAV2 CMV-cre into the lateral ventricle of Ascl1 CreERT2 (+);tdTomato animals, 7 days before stroke. Behavioral tasks including grid walking and pasta handling were performed during the 2 month of post-stroke survival period. (D) Images of EYFP+ cells in the periinfarct regions 2 months after stroke. (E) Images (quantified with Imaris) of VAMP2 located within the EYFP+ cell surface. Scale bar: 10  $\mu$ m

### **Supplementary Figure 7:**

#### **Monosynaptic connections formed between SVZ-derived neurons**

(A) In the rabies-based and cre-dependent monosynaptic tracing experiment, BFP+GFP- (monosynaptic connected cells) cells were found to be tdTomato+ (open arrowheads) or tdTomato- (filled arrowheads). (B) Quantification showing percentage of BFP+GFP-tdTomato+ cells among BFP+GFP- cells, in stroke control and FL overuse group.  $p > 0.05$ . (C) Sparse BFP+ cells were found in the contralateral cortex. Scale bar: 10  $\mu$ m.

Supplementary Figure 1

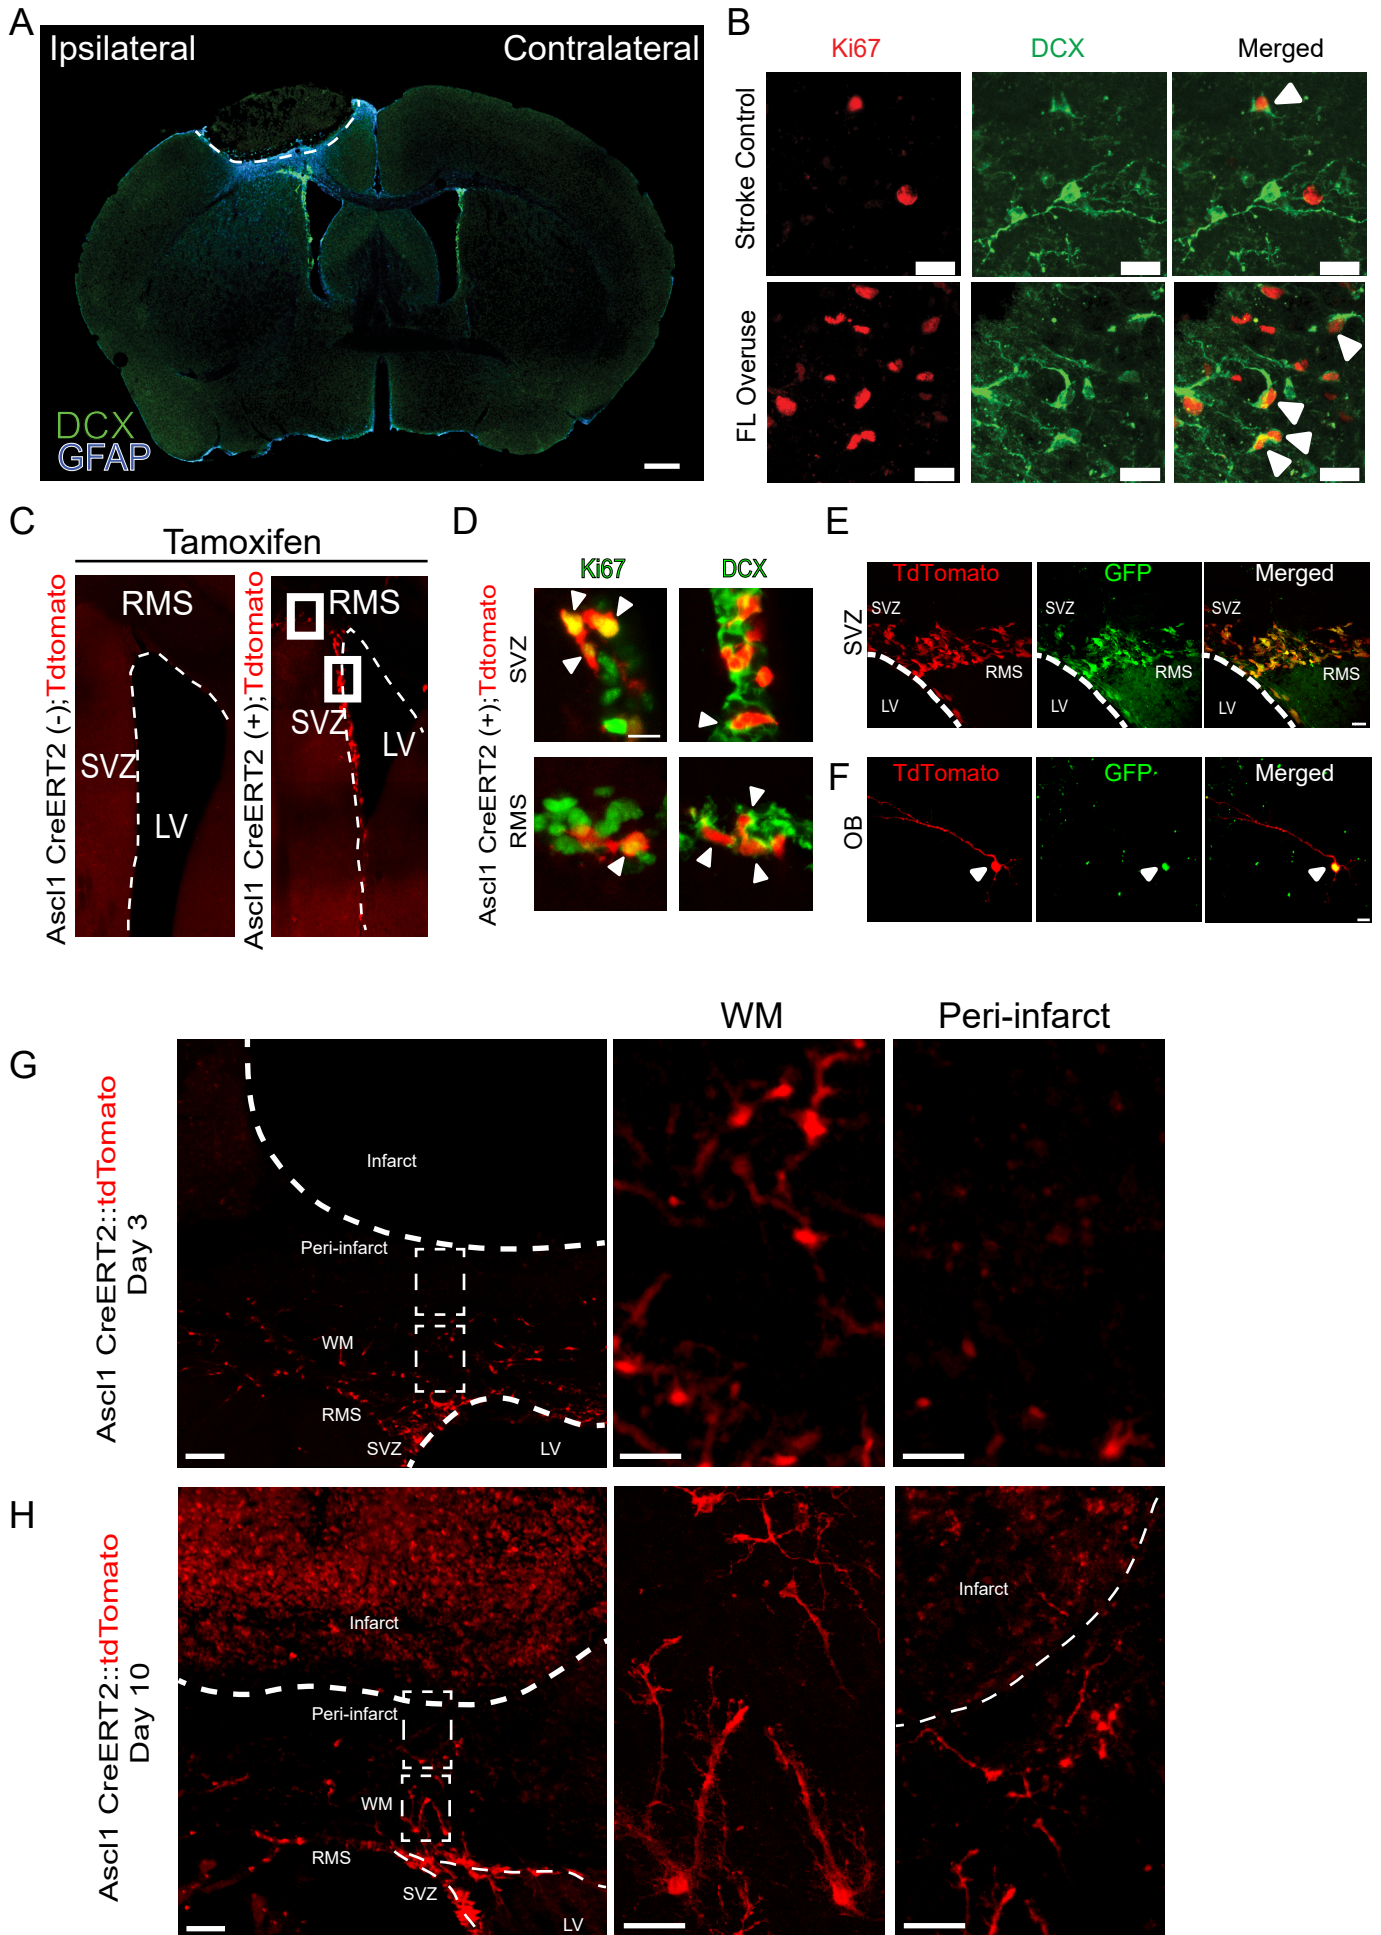

# Supplementary Figure 2

A

Ascl1 CreERT2::

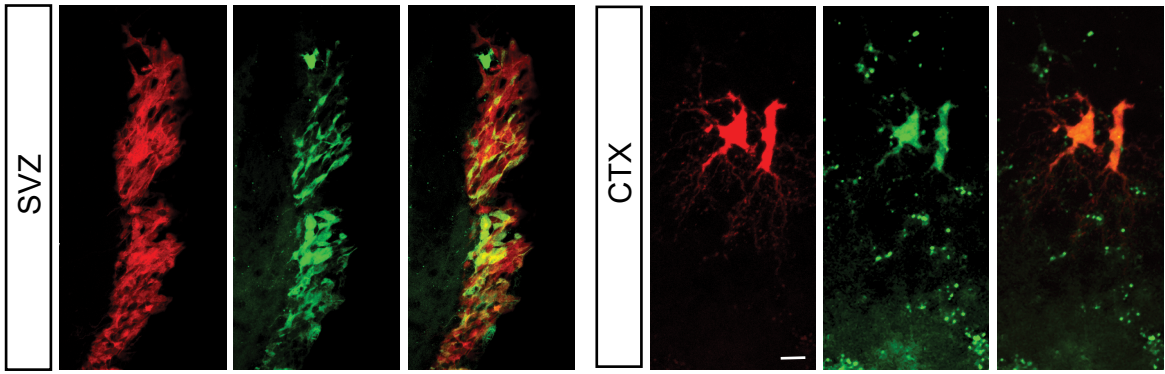

B

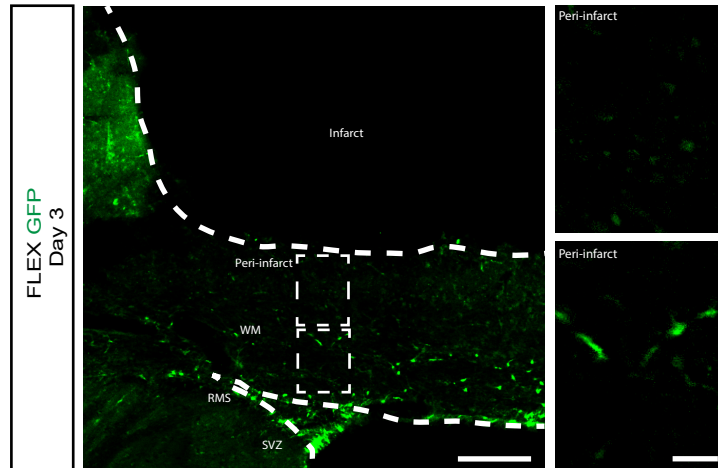

C

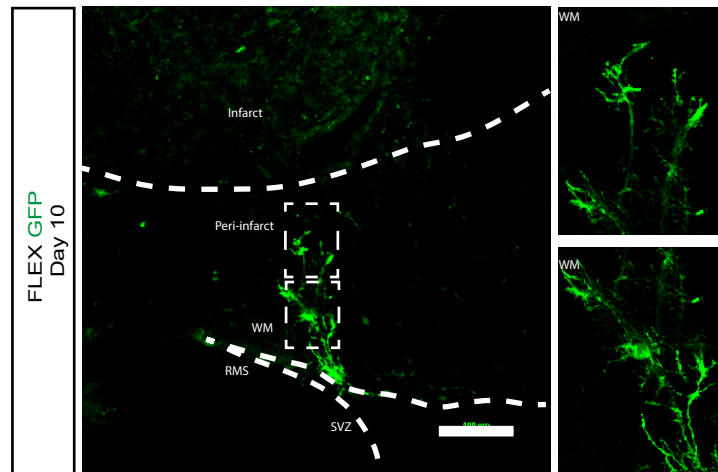

D

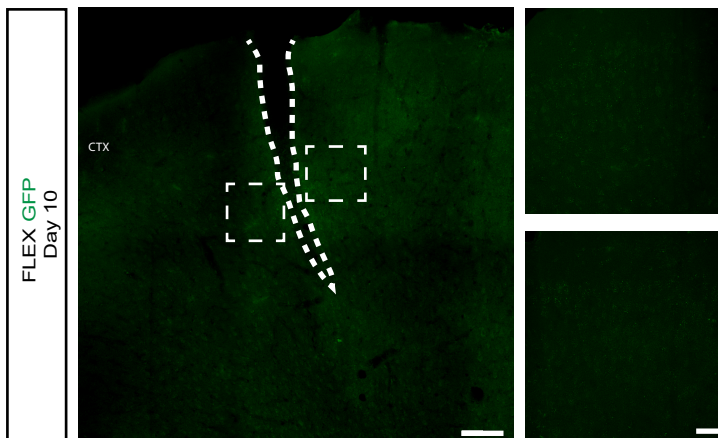

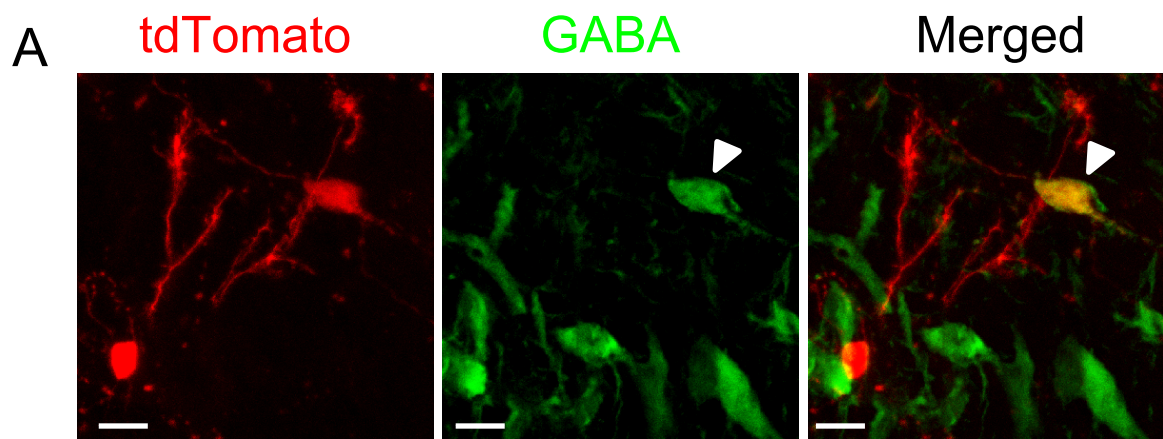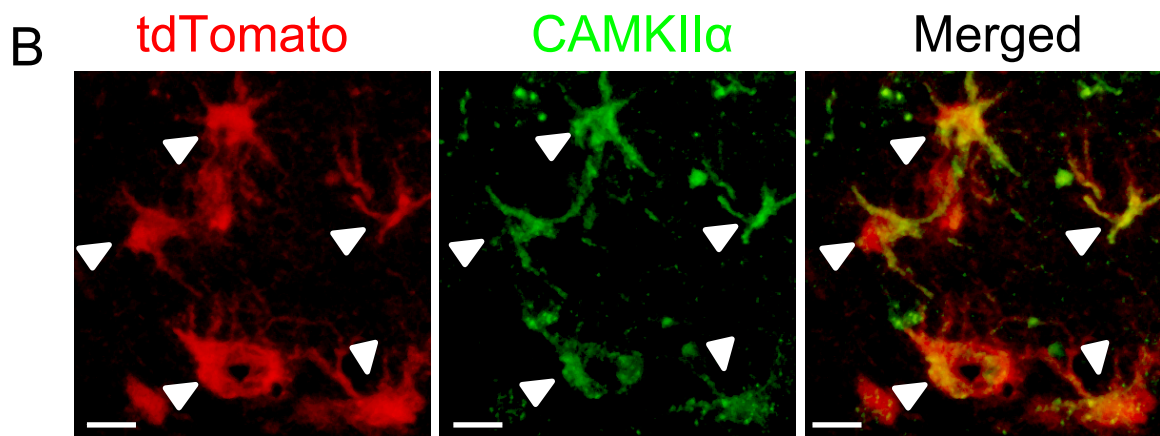

# Supplementary Figure 4

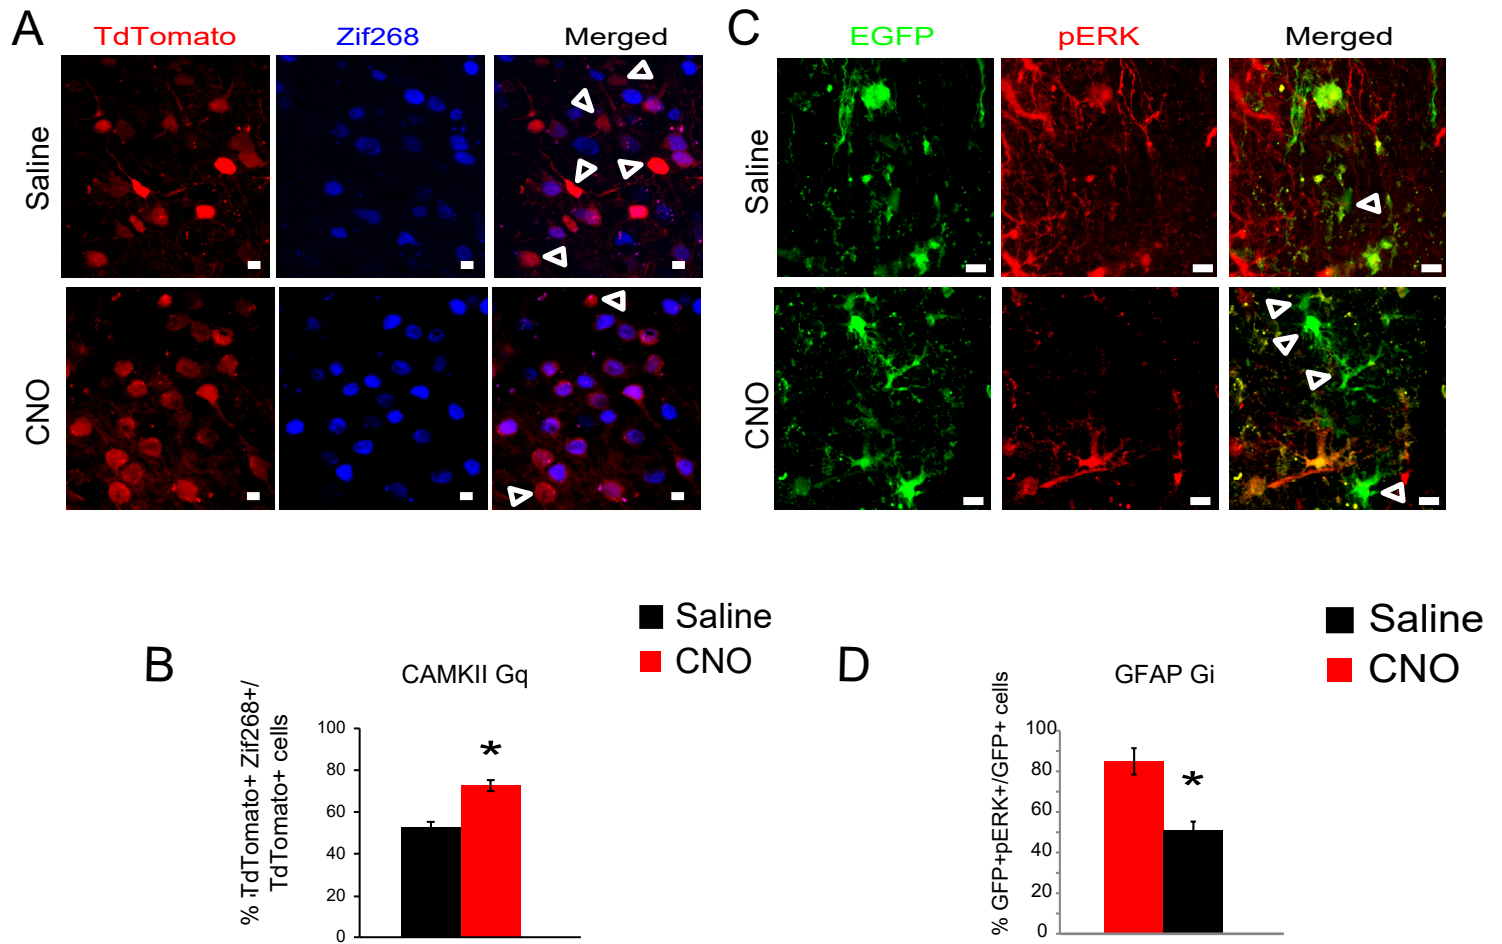

Supplementary Figure 5

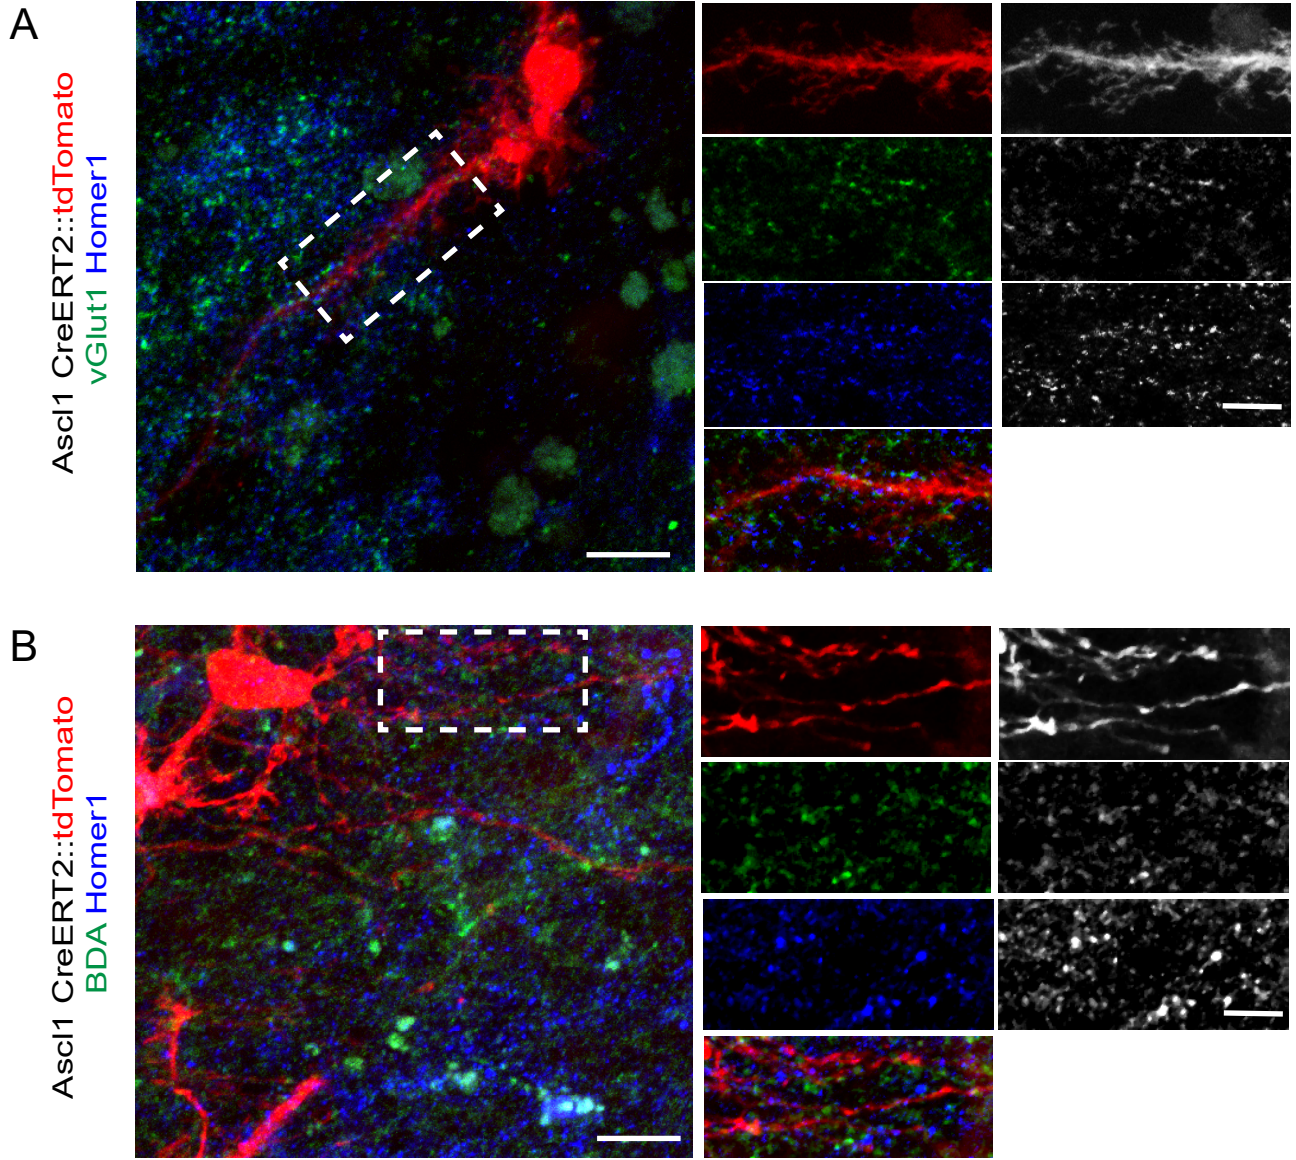



# Supplementary Figure 6

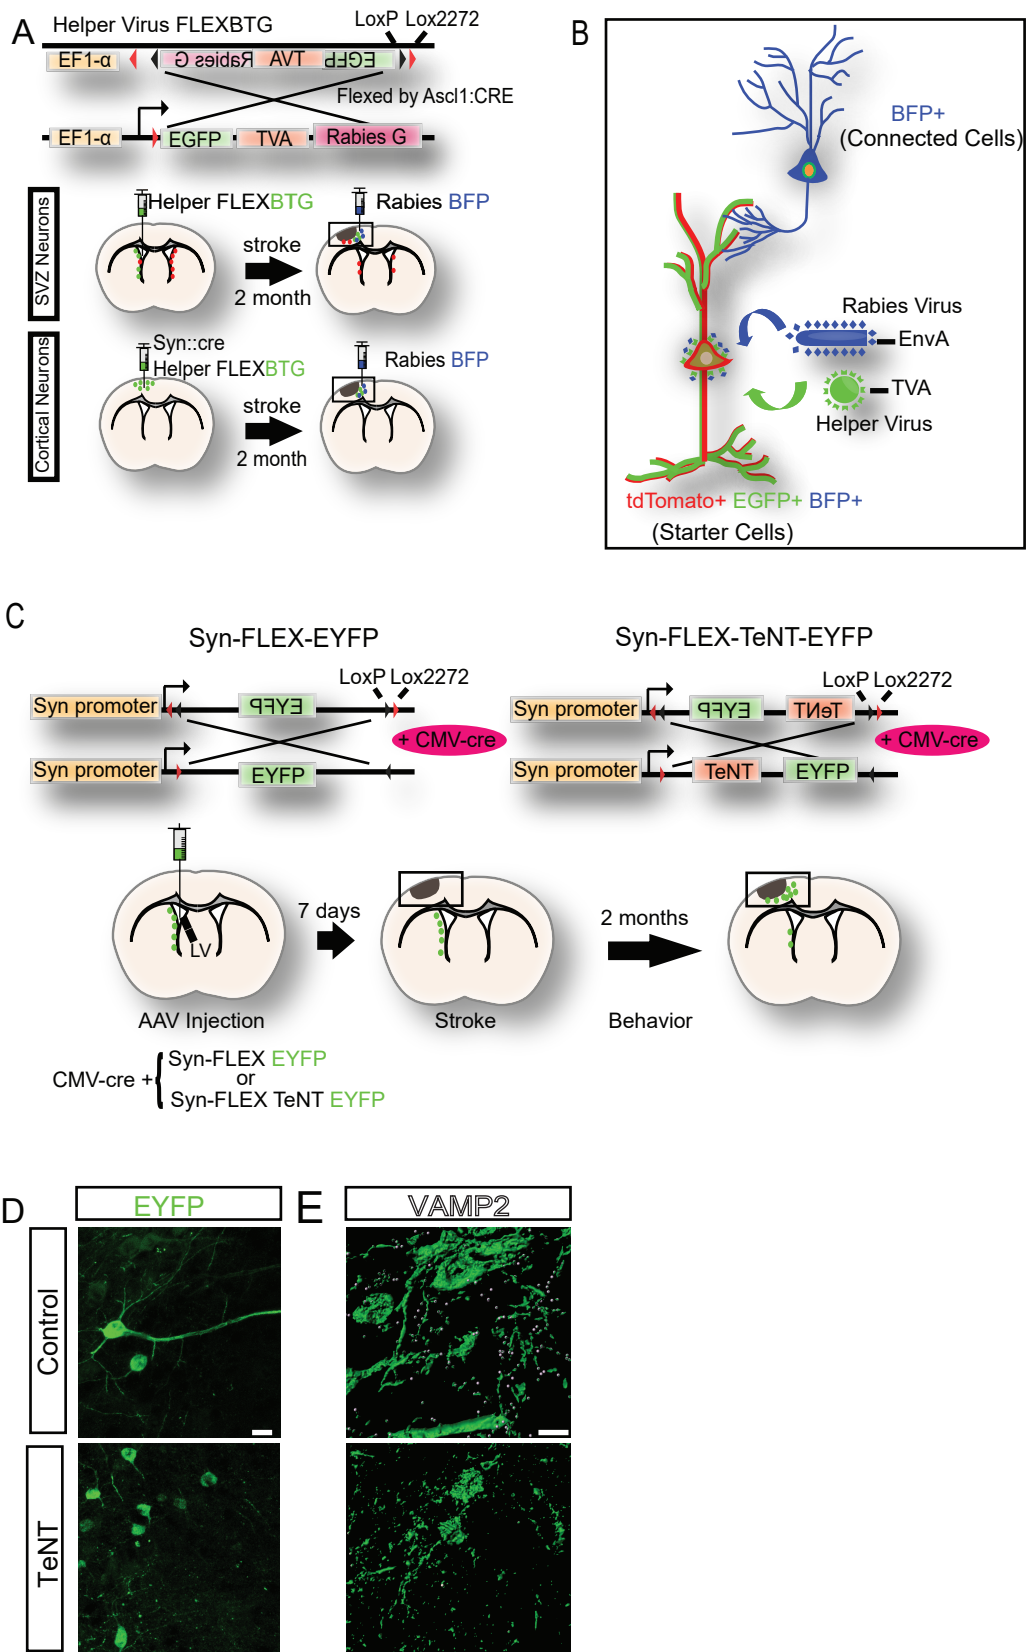

# Supplementary Figure 7

A

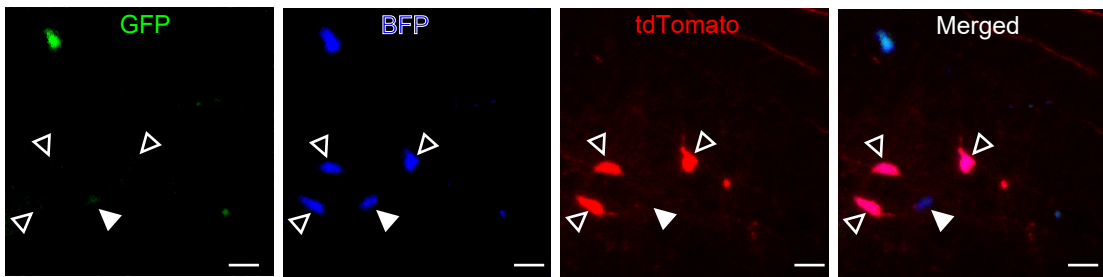

B

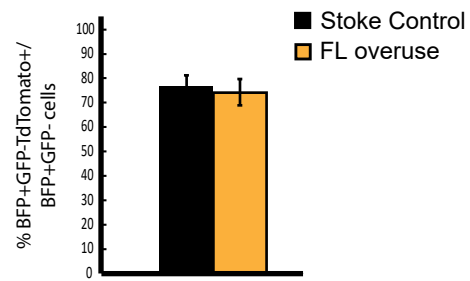

Supplement: pnas.1811825116.sapp.pdf [file pnas.1811825116.sapp.pdf]
